# Supplementary material
Source: PubMed Central journal article supplement (PMC3432817)
Supplement: embor201297s2.pdf [file embor201297s2.pdf]

Manuscript EMBOR-2012-35800

## **Myelin Basic Protein synthesis is regulated by small non-coding RNA 715**

Nina M. Bauer, Christina Moos, Jack van Horssen, Maarten Witte, Paul van der Valk, Benjamin Altenhein, Heiko J. Luhmann and Robin White

*Corresponding author: Robin White, University Medical Center Mainz*

---

### **Review timeline:**

Submission date:  
Accepted:

01 February 2012  
15 June 2012

---

### **Transaction Report:**

No Peer Review Process File is available with this article, as the authors have chosen not to make the review process public in this case.
